# Supplementary material for: Regulating BRCA1 protein stability by cathepsin S-mediated ubiquitin degradation
Source: PubMed Central journal article supplement (PMC6461859; doi:10.1038/s41418-018-0153-0), 2018-07-13

# Supplementary Figure S1

**A**

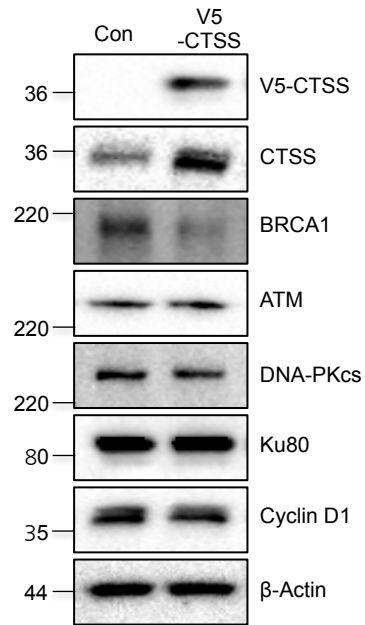

**C**

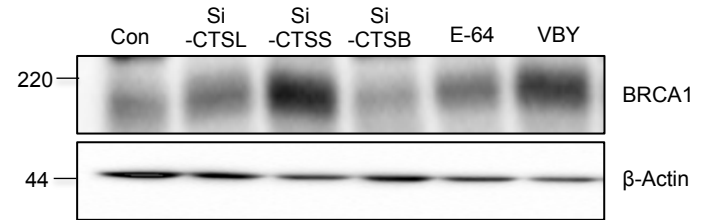

**B**

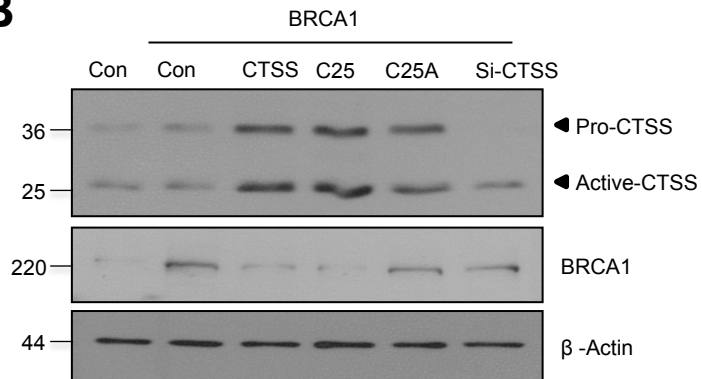

**D**

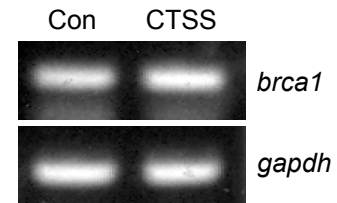

**A**

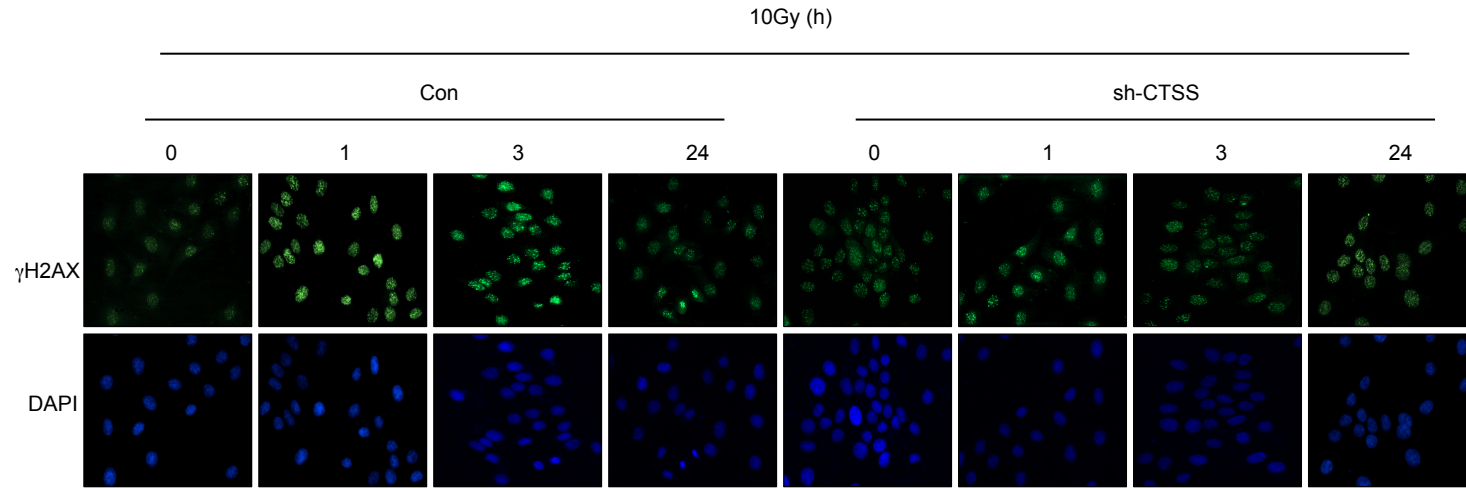

**B**

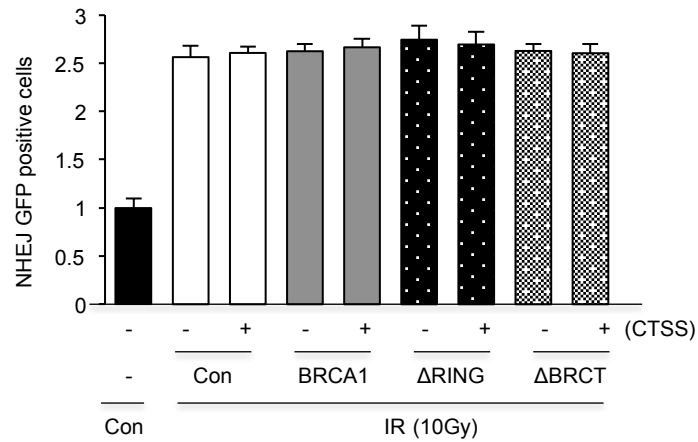

**C**

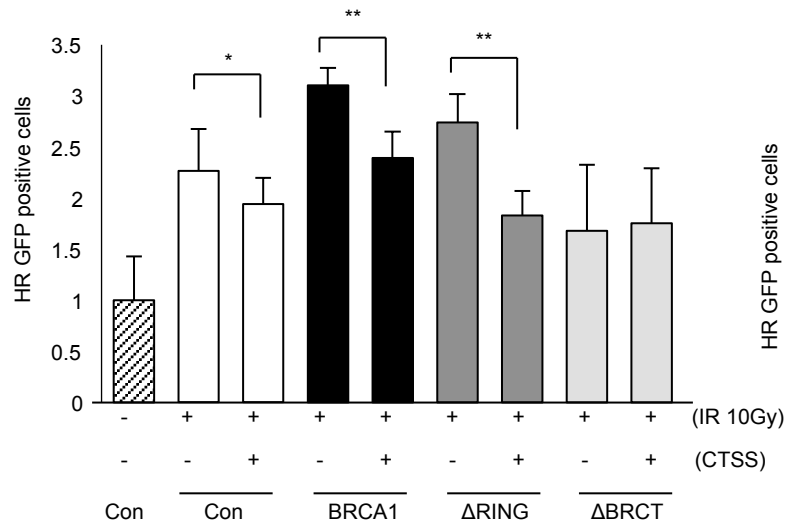

**D**

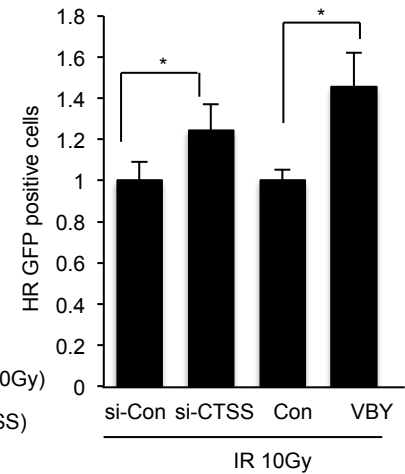

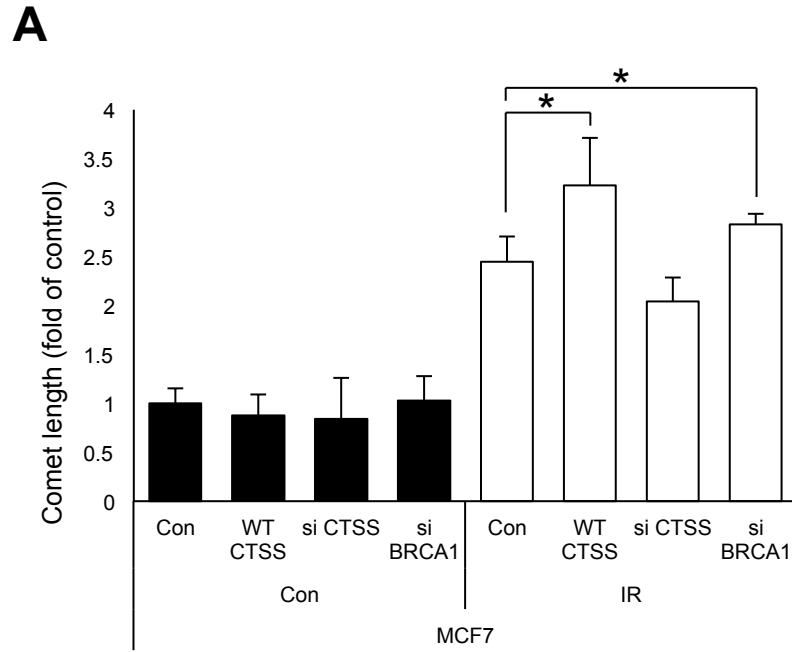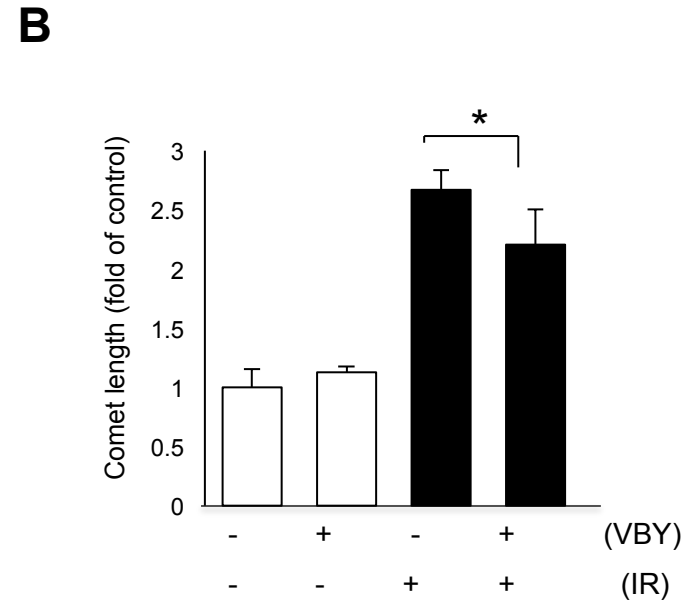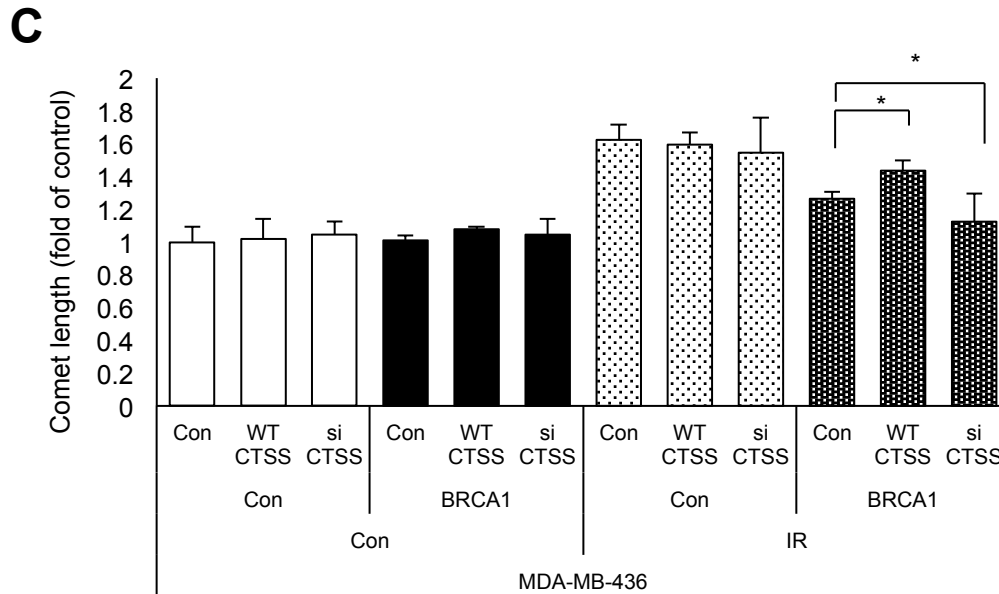

# Supplementary Figure S4

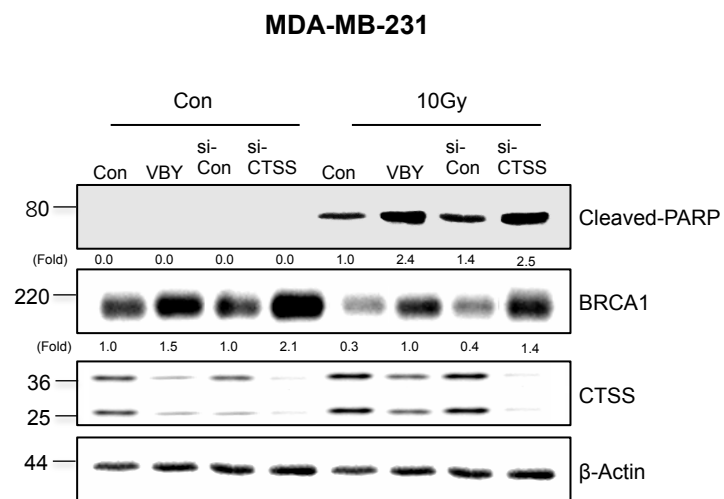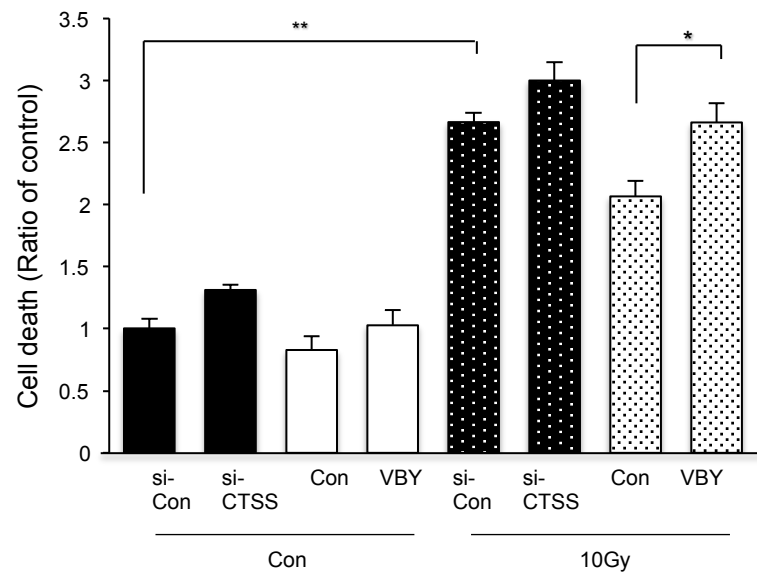

**MDA-MB-231**



# Supplementary Figure S5

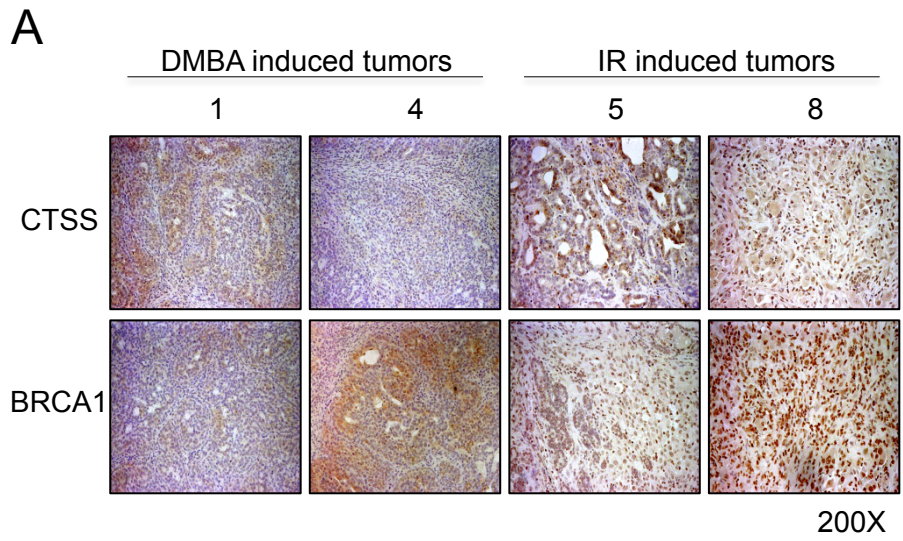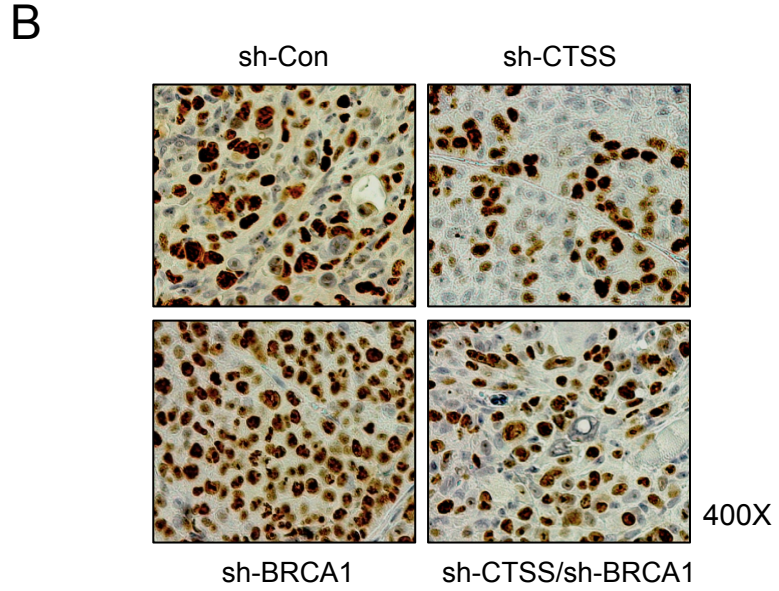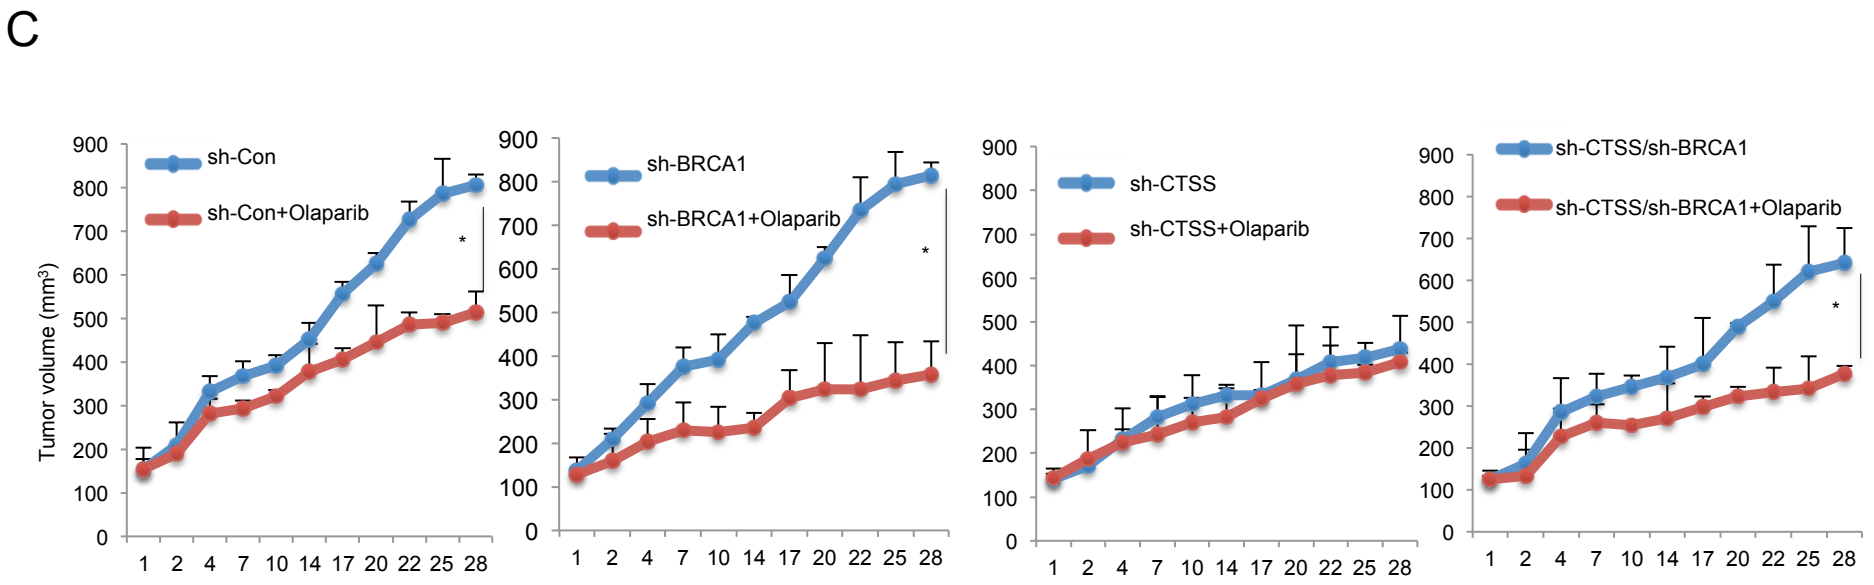

# Supplementary Figure S6

**A**

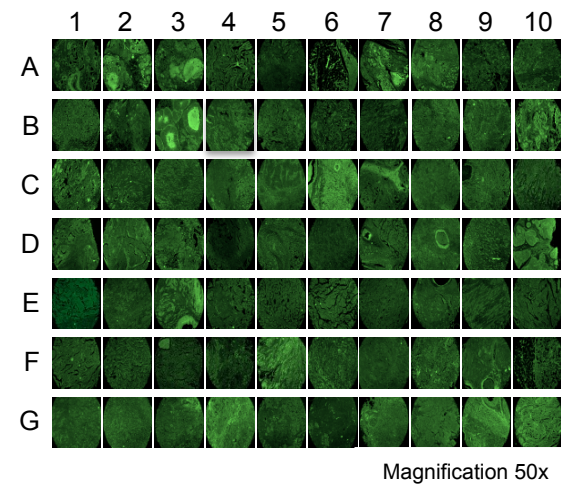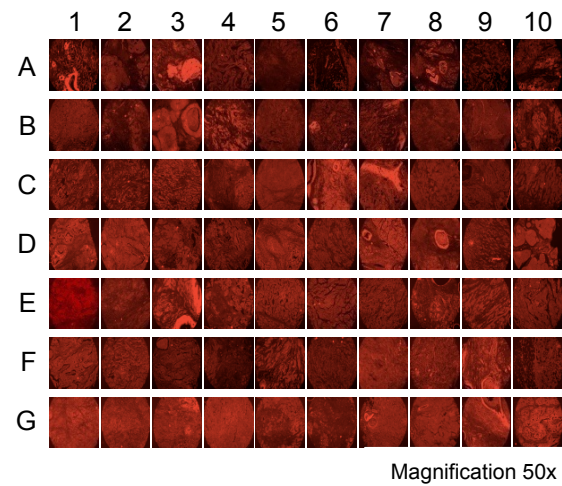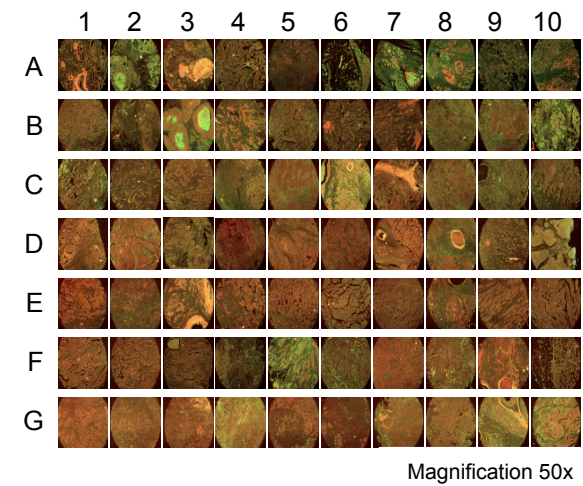

**B**

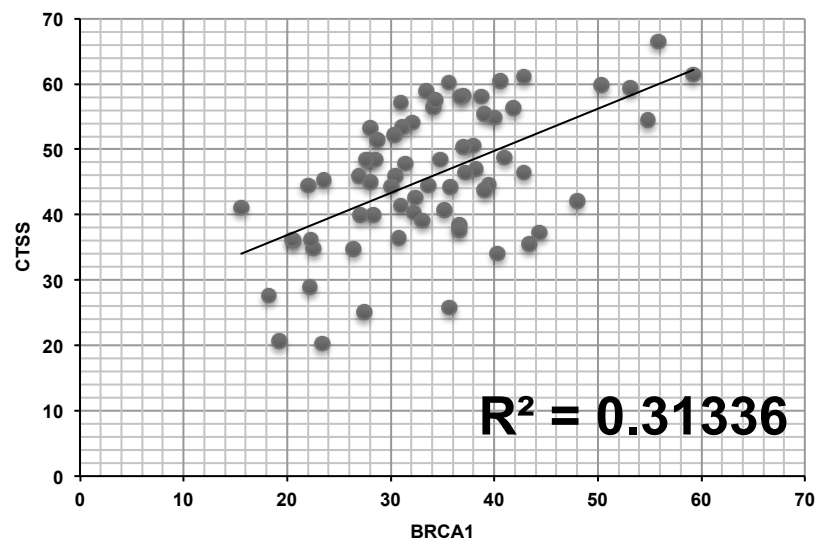

**C**

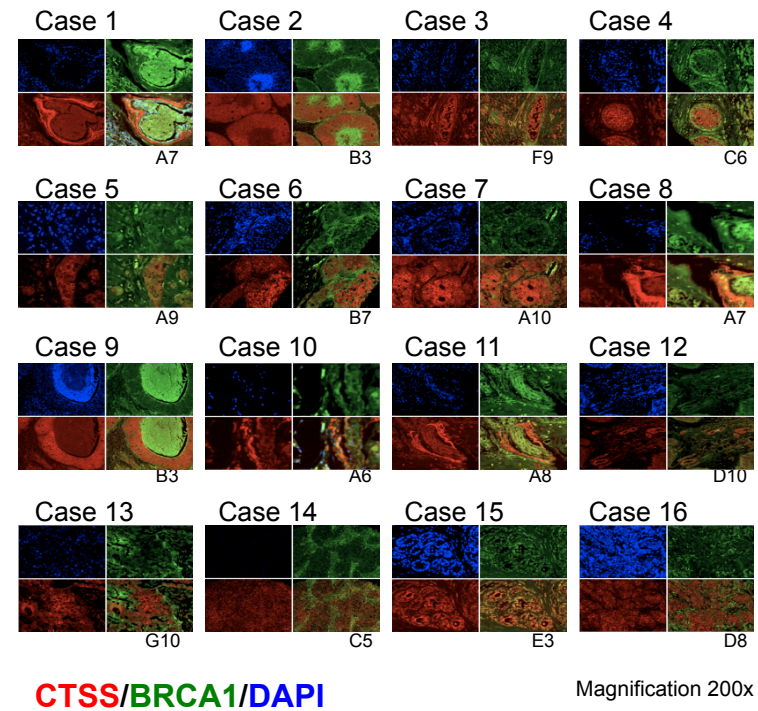

Supplement: 41418_2018_153_MOESM1_ESM.pdf [file 41418_2018_153_MOESM1_ESM.pdf]
